# Supplementary material
Source: PubMed Central journal article supplement (PMC6167142)

Supplemental Figure 1. Plawecki et al., SEX DIFFERENCES IN MOTIVATION TO SELF-ADMINISTER ALCOHOL AFTER TWO WEEKS OF ABSTINENCE IN YOUNG-ADULT HEAVY DRINKERS

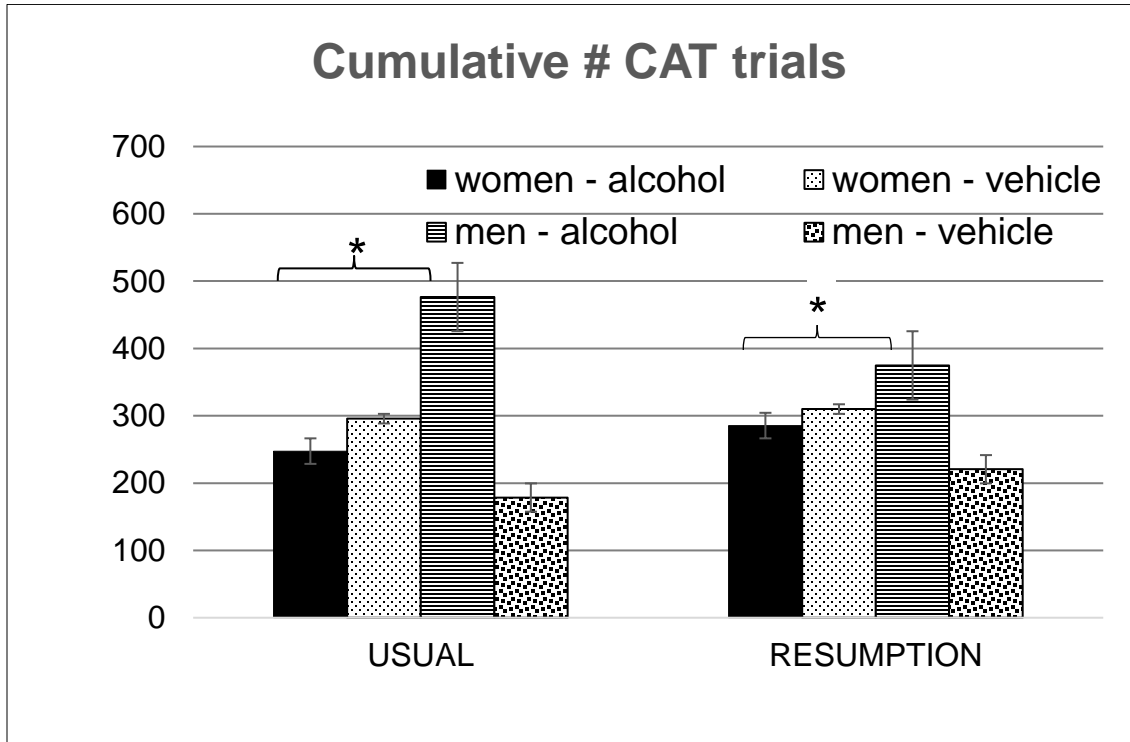

Supplemental Figure 2. Plawecki et al., SEX DIFFERENCES IN MOTIVATION TO SELF-ADMINISTER ALCOHOL AFTER TWO WEEKS OF ABSTINENCE IN YOUNG-ADULT HEAVY DRINKERS

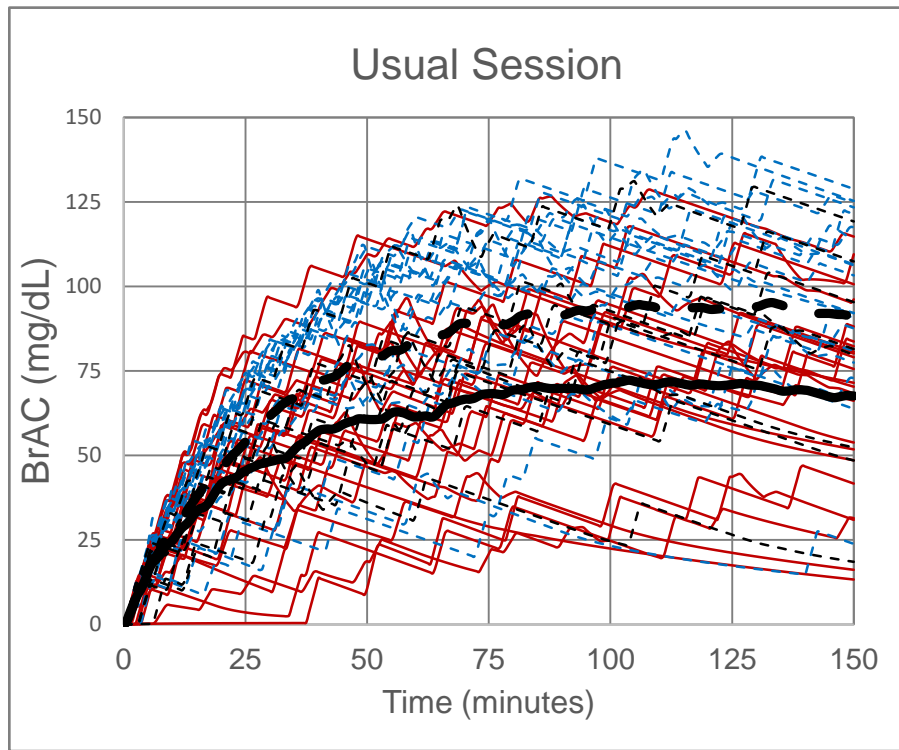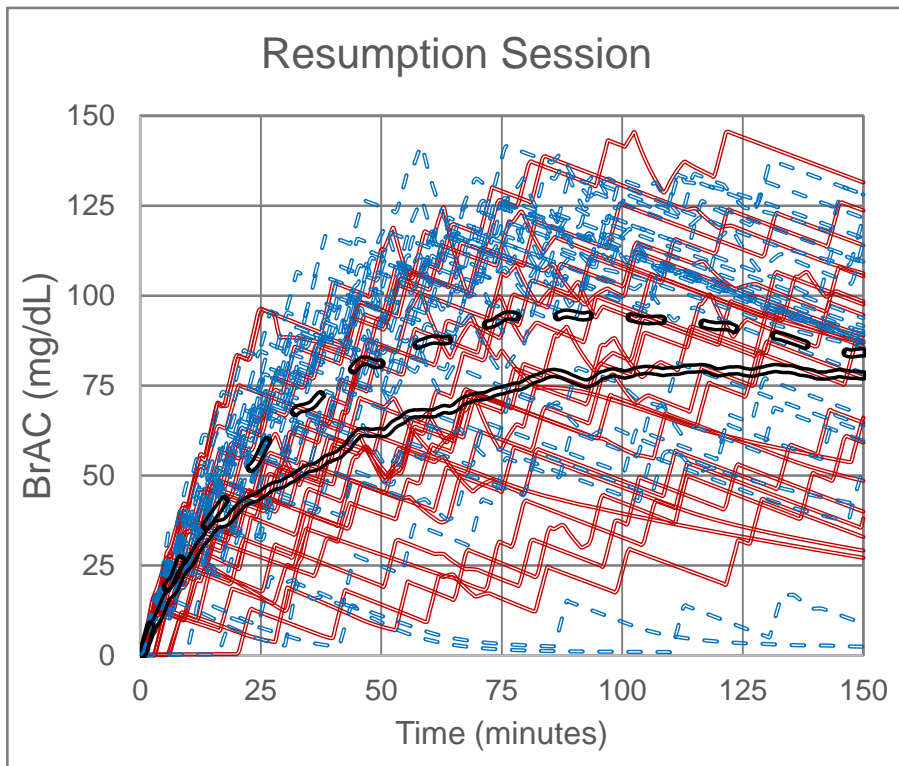

Supplement: NIHMS984354-supplement-Supp_figS1-2.pdf [file NIHMS984354-supplement-Supp_figS1-2.pdf]
